# Supplementary material
Source: Springer Nature journal article supplement (https://www.springermedizin.de/resource/supplementary/12997_2009_69_MOESM1_ESM.pdf/9623262)

**Measurement of**  
**1) cough reflex sensitivity**  
**2) ENO measurement and BAL\***

**0.5 h**

**Vehicle, L-NAME or ONO1714**

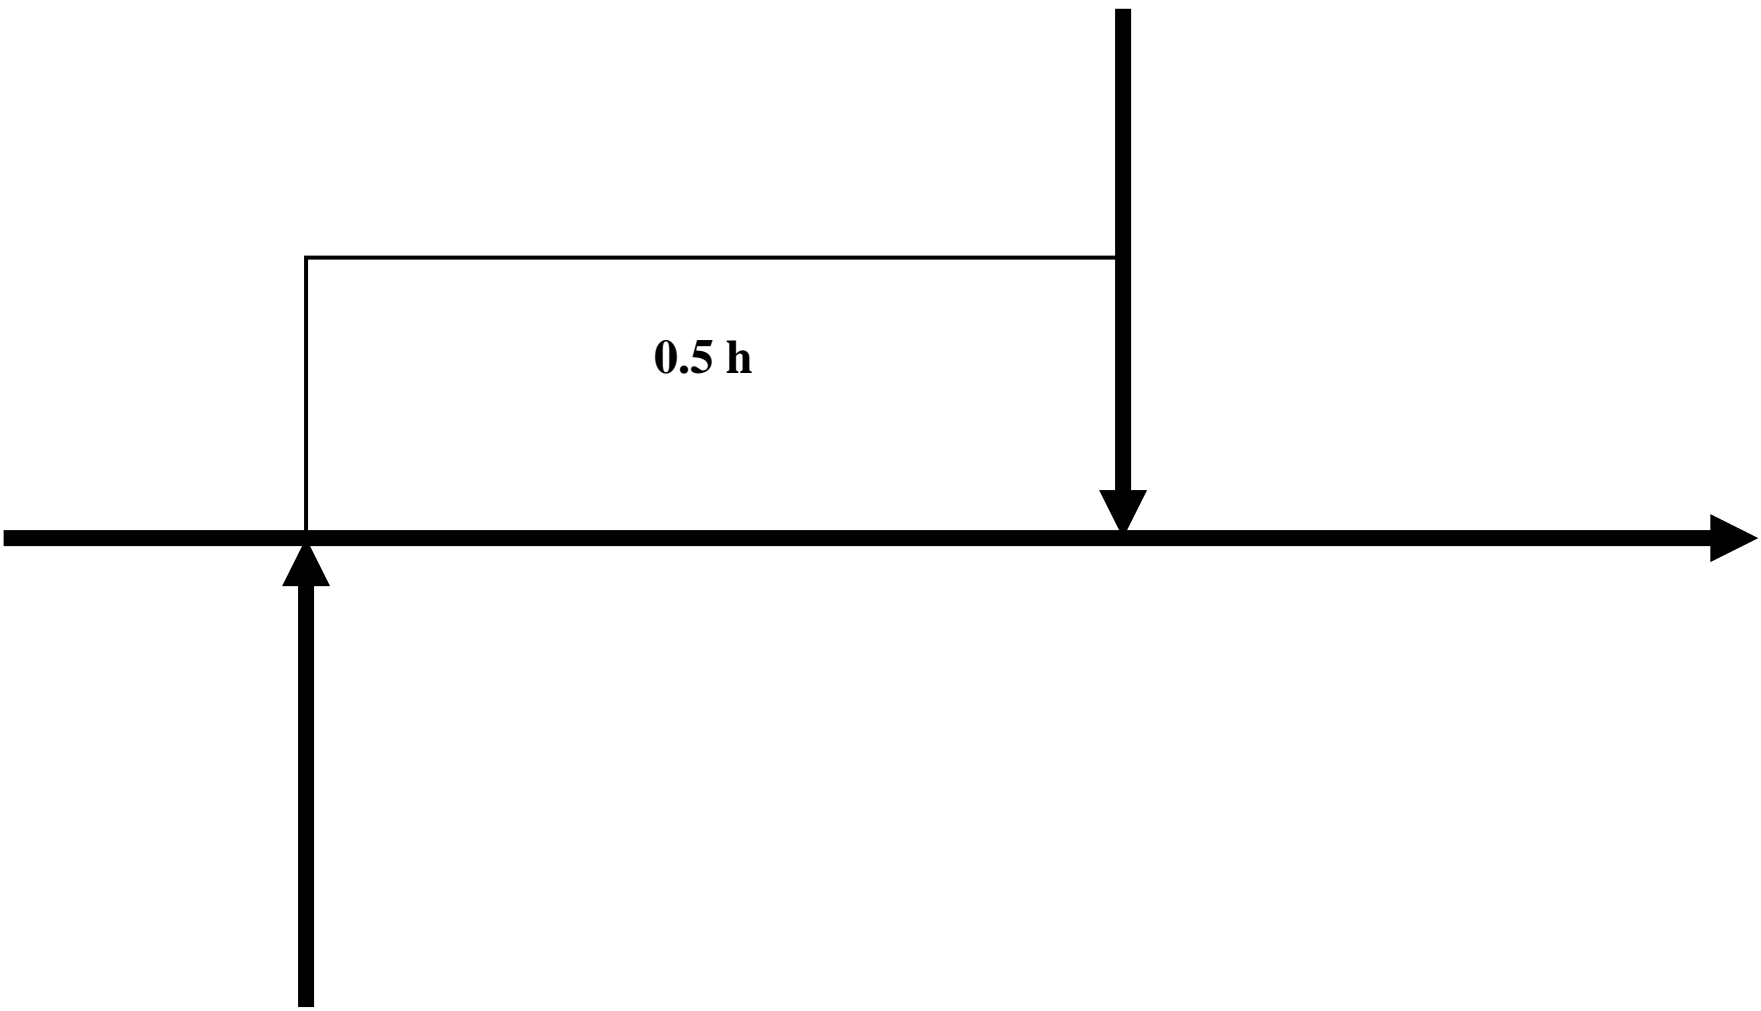

Supplement: MOESM1 [file 9623262]
